# Supplementary material for: Density functional theory studies on graphene/h-boron nitride hybrid nanosheets for supercapacitor electrode applications
Source: Royal Society of Chemistry journal article supplement (doi:10.1039/d3cp04326f), 2023-01-01
Supplement: d3cp04326f1.pdf [file d3cp04326f1.pdf]

# Density Functional Theory Studies on Graphene/h-Boron Nitride Hybrid Nanosheets for Supercapacitor Electrode Applications

Naveena Paramasivam <sup>a</sup>, Anandan Sambandam <sup>b</sup>, Baskaran Natesan <sup>a\*</sup>

<sup>a</sup> *Condensed Matter Theory Lab., Department of Physics, National Institute of Technology, Tiruchirappalli, Tamil Nadu, India – 620015.*

<sup>b</sup> *Nanomaterials and Solar Energy Conversion Lab., Department of Chemistry, National Institute of Technology, Tiruchirappalli, Tamil Nadu, India – 620015.*

## \*Corresponding Author

Dr. Baskaran Natesan,  
Professor, Condensed Matter Theory Lab.,  
Department of Physics,  
National Institute of Technology, Tiruchirappalli,  
Tamil Nadu, India – 620015.  
E-mail address: nbaski@nitt.edu  
Phone Number: +91-431-2503606

## CONTENT

|                                                |    |
|------------------------------------------------|----|
| Table S1.....                                  | S2 |
| Method for calculating the effective mass..... | S6 |
| Table S2.....                                  | S7 |
| Table S3.....                                  | S7 |
| Figure S1.....                                 | S8 |
| Figure S2.....                                 | S9 |

**Supplementary information****Table S1** Bader Charge analysis of optimized nanosheets.

| Structure | C – charge  | B – Charge | N – charge |
|-----------|-------------|------------|------------|
| C32       | C1: 0.134   |            |            |
|           | C2: -0.237  |            |            |
|           | C3: 0.004   |            |            |
|           | C4: -0.001  |            |            |
|           | C5: 0.004   |            |            |
|           | C6: -0.001  |            |            |
|           | C7: 0.110   |            |            |
|           | C8: -0.002  |            |            |
|           | C9: -0.092  |            |            |
|           | C10: 0.108  |            |            |
|           | C11: 0.000  |            |            |
|           | C12: -0.011 |            |            |
|           | C13: 0.001  |            |            |
|           | C14: 0.001  |            |            |
|           | C15: 0.002  |            |            |
|           | C16: 0.001  |            |            |
|           | C17: -0.104 |            |            |
|           | C18: 0.106  |            |            |
|           | C19: 0.002  |            |            |
|           | C20: 0.001  |            |            |
|           | C21: 0.005  |            |            |

---

|         |             |           |            |
|---------|-------------|-----------|------------|
|         | C22: -0.002 |           |            |
|         | C23: 0.005  |           |            |
|         | C24: -0.001 |           |            |
|         | C25: 0.105  |           |            |
|         | C26: -0.102 |           |            |
|         | C27: 0.004  |           |            |
|         | C28: -0.001 |           |            |
|         | C29: 0.004  |           |            |
|         | C30: -0.002 |           |            |
|         | C31: 0.004  |           |            |
|         | C32: -0.002 |           |            |
| C24B4N4 | C9: 0.098   | B1: 2.319 | N1: -2.235 |
|         | C10: 0.072  | B2: 2.617 | N2: -1.887 |
|         | C12: -0.029 | B3: 2.015 | N3: -2.600 |
|         | C18: -0.015 | B4: 2.316 | N4: -2.238 |
|         | C21: 0.087  |           |            |
|         | C22: 0.075  |           |            |
| C20B6N6 | C11: 0.143  | B1: 2.331 | N1: -2.218 |
|         | C12: 0.004  | B2: 2.609 | N2: -2.239 |
|         | C14: -0.012 | B3: 2.626 | N3: -1.963 |
|         | C18: 0.118  | B4: 2.032 | N4: -2.585 |
|         | C19: -0.107 | B5: 2.297 | N5: -2.582 |
|         | C20: 0.105  | B6: 2.301 | N6: -2.332 |
| C16B8N8 | C1: -0.852  | B1: 1.355 | N1: -3.587 |
|         | C3: -0.853  | B2: 1.355 | N2: -3.588 |

---

---

|          |            |            |             |
|----------|------------|------------|-------------|
|          | C4: -0.837 | B3: 1.355  | N3: -3.587  |
|          | C5: -0.853 | B4: 1.355  | N4: -3.587  |
|          | C6: -0.857 | B5: 1.619  | N5: -3.382  |
|          | C7: -0.853 | B6: 1.623  | N6: -3.386  |
|          | C8: -0.857 | B7: 1.620  | N7: -3.383  |
|          |            | B8: 1.620  | N8: -3.383  |
| C8B12N12 | C3: -0.852 | B1: 2.325  | N1: -2.650  |
|          | C4: -0.853 | B2: 2.665  | N2: -2.277  |
|          | C5: -0.837 | B3: 2.318  | N3: -2.598  |
|          | C6: -0.853 | B4: 2.644  | N4: -2.277  |
|          | C7: -0.857 | B5: 2.649  | N5: -2.274  |
|          | C8: -0.853 | B6: 2.664  | N6: -2.275  |
|          |            | B7: 2.707  | N7: -2.641  |
|          |            | B8: 2.694  | N8: -2.673  |
|          |            | B9: 2.317  | N9: -2.605  |
|          |            | B10: 2.324 | N10: -2.649 |
|          |            | B11: 2.704 | N11: -2.712 |
|          |            | B12: 2.703 | N12: -2.639 |
| C4B14N14 | C1: -0.512 | B1: 2.323  | N1: -2.661  |
|          | C2: 0.230  | B2: 2.633  | N2: -2.676  |
|          | C3: -0.367 | B3: 2.674  | N3: -2.396  |
|          | C4: 0.439  | B4: 2.461  | N4: -2.611  |
|          |            | B5: 2.632  | N5: -2.629  |
|          |            | B6: 2.665  | N6: -2.386  |
|          |            | B7: 2.653  | N7: -2.285  |

---

B16N16

---

|            |             |
|------------|-------------|
| B8: 2.705  | N8: -2.449  |
| B9: 2.718  | N9: -2.657  |
| B10: 2.707 | N10: -2.688 |
| B11: 2.321 | N11: -2.650 |
| B12: 2.701 | N12: -2.716 |
| B13: 2.718 | N13: -2.712 |
| B14: 2.715 | N14: -2.651 |
| B1: 1.659  | N1: -3.656  |
| B2: 1.659  | N2: -3.655  |
| B3: 1.659  | N3: -3.655  |
| B4: 1.659  | N4: -3.655  |
| B5: 1.658  | N5: -3.655  |
| B6: 1.659  | N6: -3.650  |
| B7: 1.659  | N7: -3.655  |
| B8: 1.659  | N8: -3.655  |
| B9: 1.658  | N9: -3.655  |
| B10: 1.654 | N10: -3.655 |
| B11: 1.659 | N11: -3.655 |
| B12: 1.689 | N12: -3.655 |
| B13: 1.689 | N13: -3.655 |
| B14: 1.689 | N14: -3.655 |
| B15: 1.689 | N15: -3.655 |
| B16: 1.689 | N16: -3.655 |

---

### Method for calculating the effective mass

The effective mass of the electron and hole is calculated by fitting a parabolic curve to the  $E - K$  diagram (Band structure) obtained from DFT calculation.

$$m^* = \frac{\hbar^2}{\frac{d^2E}{dK^2}}$$

In general, effective mass is given as,

Also, the dispersion relation  $E(K)$  compensates for the internal force due to the crystal, which allows us to use the classical concepts for the electron as long as its mass is taken as  $m^*$ . So,

from the  $E - K$  diagram, the  $\frac{d^2E}{dK^2}$  is obtained by fitting a parabolic curve at the required high symmetry point near the Fermi region. In particular, valence band maximum (VBM) and conduction band minimum (CBM) are considered for our calculation.

The parabolic curve fit in terms of  $E - K$  is written as,

$$E = A_0K^2 + A_1K + A_2$$

On differentiating  $E$  concerning  $K$  twice, we get,  $\frac{d^2E}{dK^2} = 2A_0$ . Therefore, the effective mass in

terms of parabolic curve fit is given as,  $m^* = \frac{\hbar^2}{2A_0}$ .

The coefficient  $A_0$  is obtained by fitting the curves, and just from this, we have calculated the effective mass of electrons and holes at VBM and CBM, respectively.

Dimension of  $A_0$ :

We know,  $D[E] = eV$ ,  $D[K] = \frac{1}{\text{\AA}}$  as  $K = \frac{2\pi}{\lambda}$  and  $\frac{d^2E}{dK^2} = 2A_0$

$$\text{So, } D[A_0] = eV(\text{\AA})^2 = 1.6 \times 10^{-39} \text{Jm}^2$$

From which, we can obtain effective mass in terms of  $m_e$

$$m^* = \frac{\hbar^2}{2A_0} = \frac{3.445 \times 10^{-30}}{A_0} \text{kg} = \frac{3.786}{A_0} m_e$$

**Table S2** Excessive surface charge density ( $\Sigma$ ) of optimized nanosheets.

| Structure | $\Sigma$ at -1eV ( $\mu C cm^{-2}$ ) | $\Sigma$ at +1eV ( $\mu C cm^{-2}$ ) |
|-----------|--------------------------------------|--------------------------------------|
| C32       | -1.110                               | 1.200                                |
| C24B4N4   | -4.239                               | 0.132                                |
| C20B6N6   | -5.349                               | 0.311                                |
| C16B8N8   | -3.591                               | 2.204                                |
| C8B12N12  | -3.519                               | 0.078                                |
| C4B14N14  | -5.790                               | 0.183                                |
| B16N16    | -17.583                              | 0.131                                |

**Table S3** Quantum capacitance ( $C_q$ ) of optimized nanosheets.

| Structure | Potential (eV) | $C_q$ ( $\mu F cm^{-2}$ ) |
|-----------|----------------|---------------------------|
| C32       | 1.00           | 2.629                     |
| C24B4N4   | -0.53          | 9.128                     |
| C20B6N6   | -0.64          | 14.950                    |
| C16B8N8   | 0.97           | 16.655                    |
| C8B12N12  | -0.28          | 11.015                    |
| C4B14N14  | -0.99          | 22.518                    |
| B16N16    | -0.65          | 31.539                    |

**Fig. S1** Band structure of pristine graphene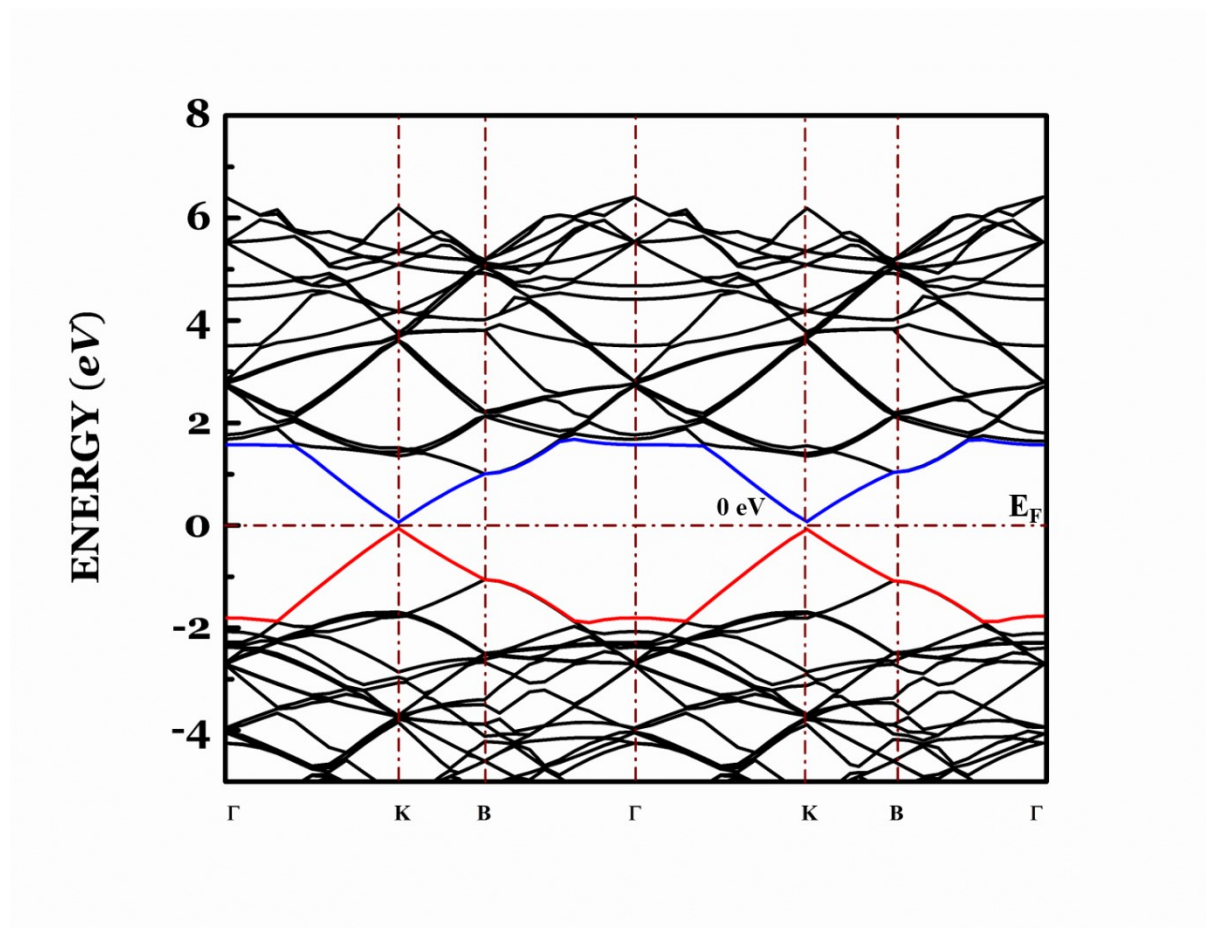

— Conduction Band Minimum (CBM)

— Valence Band Maximum (VBM)



**Fig. S2** Band structure of (a) C<sub>24</sub>B<sub>4</sub>N<sub>4</sub>, (b) C<sub>20</sub>B<sub>6</sub>N<sub>6</sub>, (c) C<sub>16</sub>B<sub>8</sub>N<sub>8</sub>, (d) C<sub>8</sub>B<sub>12</sub>N<sub>12</sub>, (e) C<sub>4</sub>B<sub>14</sub>N<sub>14</sub>, and (f) B<sub>16</sub>N<sub>16</sub> nanosheets.

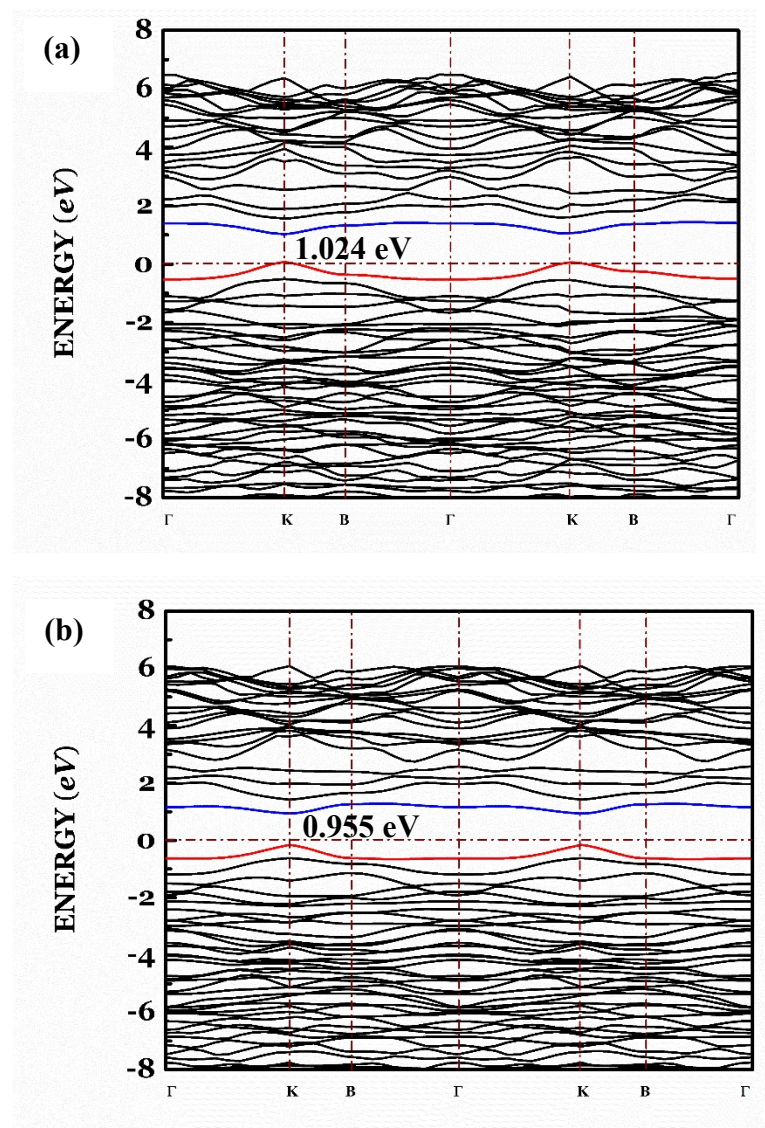

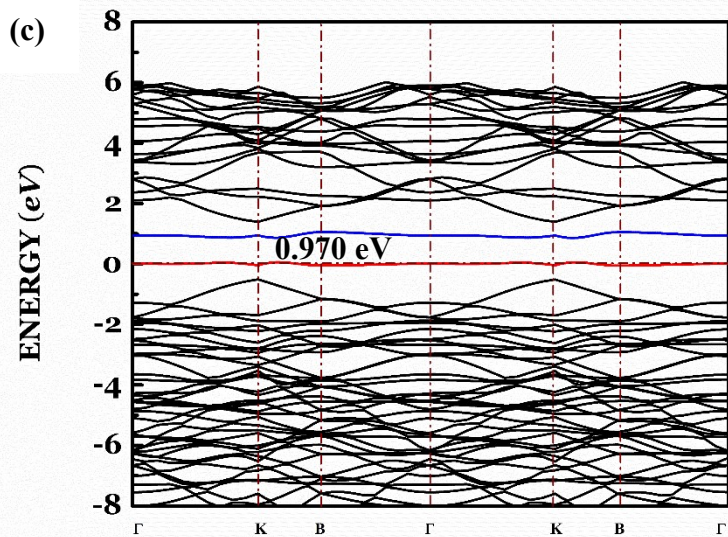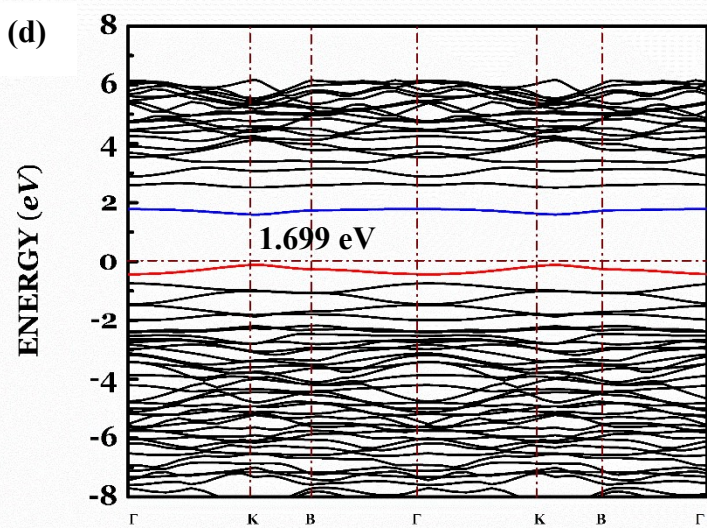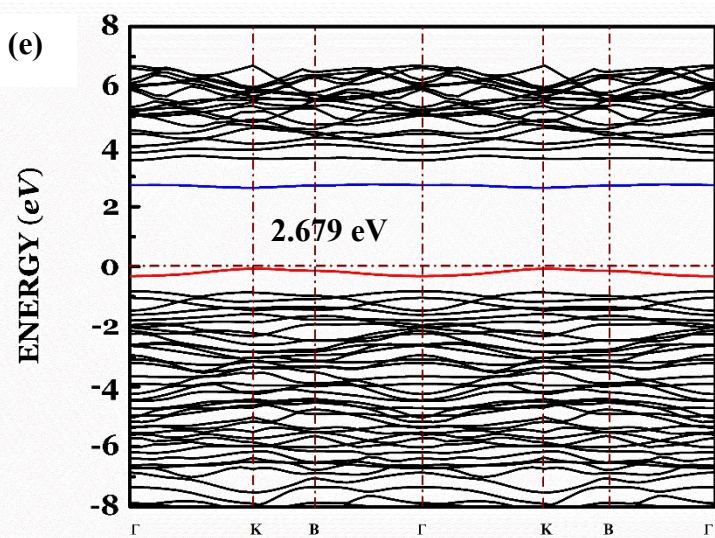

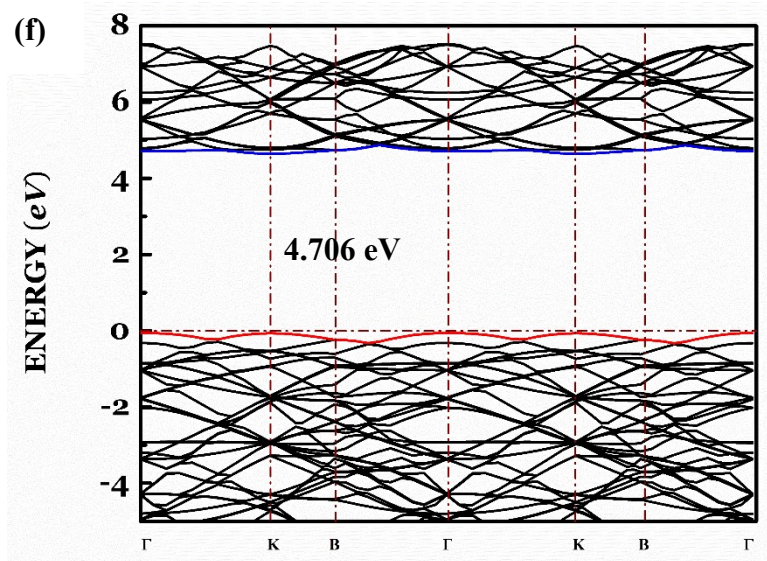

— Conduction Band Minimum (CBM)

— Valence Band Maximum (VBM)
